# Supplementary material
Source: PubMed Central journal article supplement (PMC3767500)
Supplement: 1308127110_sapp.pdf [file 1308127110_sapp.pdf]

# Structure of the YajR Transporter Suggests a Transport Mechanism Based on the Conserved Motif A

Daohua Jiang<sup>1,2</sup>, Yan Zhao<sup>1,3</sup>, Xianping Wang<sup>1</sup>, Junping Fan<sup>1</sup>, Jie Heng<sup>1</sup>, Xuehui Liu<sup>1</sup>, Wei Feng<sup>1</sup>, Xusheng Kang<sup>1</sup>, Bo Huang<sup>1</sup>, Jianfeng Liu<sup>2</sup>, Xuejun C. Zhang<sup>1</sup>

<sup>1</sup> National Laboratory of Macromolecules, National Center for Protein Science- Beijing, Institute of Biophysics, Chinese Academy of Sciences, 15 Datun Road, Beijing, China 100101 <sup>2</sup> School of Life Science and Technology, Huazhong University of Science and Technology, Wuhan, Hubei, China 430074 <sup>3</sup> School of Life Sciences, University of Science and Technology of China, Hefei, Anhui, China 230027

## Structural description

### Overall structure

Within the TM core, the compact N-domain of YajR is formed by TMs 1–6 and possesses an internal pseudo two-fold symmetry (with the axis roughly parallel to the membrane plane) connecting TMs 1–3 to 4–6. Furthermore, the N-terminal domain is related to the six C-terminal TM helices (*i.e.* TMs 7–12) through another pseudo two-fold symmetry (with the axis perpendicular to the membrane plane). Thus, similar to known MFS structures, YajR consists of four symmetrical, three-helix repeats. The first helix in each repeat (*i.e.* TMs 1, 4, 7, and 10) contributes to formation of the cavity, and is thus referred to as the central helix. These central helices appear to play two major roles. Firstly, they determine substrate specificity and thus usually contain more polar residues facing the central cavity than other helices, allowing more specific interactions with a substrate than hydrophobic residues could offer. Compared with other MFS structures, TM4 in YajR losses two a.a. residues in the sequence region G<sup>114</sup>AIAA<sup>118</sup>. Of the known 3D structures of MFS transporters, YajR is currently the only one that contains a break in the middle of a TM helix. Such a broken TM helix provides more cavity space thus likely contributing to substrate specificity. Secondly, the central helices contribute to the interactions in both the inward and outward states, for example, by dynamically participating in distinct inter-domain helical bundles. The second helix in each repeat (*i.e.* TMs 2, 5, 8, and 11) is usually long and curved, assuming a banana-like shape. Together, they form the side walls of the central cavity and are referred to here as rocker helices to indicate their direct involvement in inter-domain conformational changes. The third group of helices (*i.e.* TMs 3, 6, 9, and 12) are located at both ends of the longest dimension of the TM core (Fig. 1B). They do not directly contribute to the formation of the cavity, however, they do contact the lipid bilayer directly and are referred to as supporting helices. The fact that they are more hydrophobic than the central and rocker helices and are in general less conserved among orthologs is in agreement

with their assumed role (Fig. S1B). Together, these 12, symmetry related, TM helices form the structural basis of the rocker-switch mechanism of the YajR transporter.

In general, the helical type of integral membrane proteins contain more a.a. residues of short side chains (*e.g.* Gly, Ala, Ser, or Thr) in the helical region than soluble proteins. Such residues favor more compact helix-helix packing (1). Intuitively, such residues would allow smoother dynamic movement between TM helices should such movement be required by a function of the membrane protein. By searching for SxxSxxxS or SxxxSxxS patterns in the a.a. sequence (where S stands for short side chain a.a. residues and x stands for any residues), we identified twelve such sequence regions in the TM core domain of YajR (Table S2). Four of them are observed to be involved in the interface between the N- and C-domain in the outward conformation, and other two are potentially involved in the domain interface in the inward conformation. This observation further supports the notion that MFS proteins undertake rocker switch movement during substrate transporting.

Moreover, charge-dipole interactions are commonly used to stabilize soluble proteins (2). They are also frequently observed in the helix-type of integral membrane proteins. In our YajR crystal structure, all helices in the TM core domain have at least one charge-helix dipole interaction at either the N- or C-terminal (Table S5). Six of them are strictly or highly conserved among YajR from different species. For motif A, such an inter-domain, charge-dipole interaction is used to stabilize one of the two low energy states during the transporting process.

### Central cavity

The path of substrate transport is believed to be through the central cavity between the N- and C- domains of the TM core (3, 4). In the outward conformation of YajR, the cavity is *ca.* 20 Å deep and 10 Å wide. Inside the cavity, the N-domain side is positively charged, whereas the C-domain side is negatively charged (Fig. S4). The open side of the cavity has two clefts between the N- and C-domains, one on

each side-wall. Most hydrophilic residues in the transmembrane region of the TM core point into the cavity. In particular, in the outward conformation, Arg24, Tyr57, Gln61, and Gln65 from the N-terminal domain face the cavity. Of these, Arg24 serves as a C-cap for the N-terminal portion of the broken TM4, and Gln65 serves as an N-cap for the C-terminal portion of TM4. From the C-terminal domain, His225, Asn317, Glu320, Tyr343, and Gln347 face the central cavity. In particular, His225 and Glu320 are candidates for protonation. While these residues are absolutely conserved in YajR and AraEP proteins from a variety of Gram-negative bacteria (Fig. S1B), most of them are not conserved in the homologous multi-drug efflux exporter EmrD (Fig. S1A), suggesting that YajR transports a different class of substrates from the hydrophobic substrates transported by EmrD. Importantly, all residues forming the surface of the central cavity, both hydrophobic and hydrophilic, are highly conserved among YajR and AraEP proteins, indicating that these transporters share conserved functions in their corresponding host organisms.

#### Characterization of the YAM domain

The 65-residue small domain at the C-terminal of YajR possesses a modified ferredoxin-like fold and has dimensions of  $22 \times 25 \times 37 \text{ \AA}^3$  (Fig. 1B). While ferredoxin-like folds usually have a  $\beta\alpha\beta\beta\alpha\beta$  secondary structural pattern, the last  $\beta$ -strand is missing in the small domain at the C-terminal of YajR. The remaining three  $\beta$ -strands form one antiparallel  $\beta$ -sheet with both  $\alpha$ -helices located on one side of the sheet and the other side facing the TM core. This folding topology is similar to that of the metal-binding domain (MBD) of P1-type ATPase (PDB ID: 3DXS) (5), which is located at the N-terminal of the ATPase and is postulated to play a regulatory role. Thus, we termed the small domain at the C-terminal of YajR proteins as well as their homologous AraEP proteins as the YajR/AraEP/MBD or YAM domain. The modified ferredoxin-like fold of the YAM domain is predicted to be conserved in all YajR transporters (Fig. S1B).

To study the function of the YAM domain, we expressed and purified the YAM domain of *E. coli* YajR and measured its thermo-denaturation using thermofluor assays (Fig. S6). Our results showed that the YAM domain has a  $T_m$  above  $75^\circ\text{C}$ , and indicated that the thermal stability increased at increasing concentrations of halogen ions, but not  $\text{Na}^+/\text{K}^+$  cations. In addition, the stability increased with increasing pH over an experimental range of 5.5–6.2. Therefore, the YAM domain of *E. coli* YajR exhibits high thermal stability which is independent of the TM core, and this stability may change in response to pH and halogen ion concentration.

In the outward conformation of YajR, the YAM domain is located outside of the TM core, and has only minor interactions with the TM core (with a total of *ca.*  $840 \text{ \AA}^2$  buried solvent-accessible surface from both the TM core and the YAM domain). In addition, pull-down experiments were performed with YajR peptides consisting of the isolated TM core (YajR- $\Delta$ YAM) and the YAM domain, and no interactions

were observed between them. In a thermofluor assay, the recombinant protein of YajR- $\Delta$ YAM showed only slightly lower thermal stability than the full length protein (Fig. 1A). These results suggest that YAM domain may have a regulatory instead of a structural role.

#### Methods

##### Protein expression and purification

The YajR gene (GenBank ID: 251783932) was cloned from the genome of *E. coli* BL21(DE3) and was found to express well as a recombinant protein in high-throughput expression screening (6). The DNA encoding the full length YajR was subcloned into the pET-28a vector (Novagen, US) with an in-cleavable His<sub>6</sub> tag fused at the C-terminus, and the nucleotide sequence was confirmed using DNA sequencing. The plasmid was transformed into *E. coli* C43 (DE3) strain (7). Cells were grown at  $37^\circ\text{C}$  in TB medium until the cell density reached an  $\text{OD}_{600}$  of 1.3. The temperature was then reduced to  $16^\circ\text{C}$  before induction with 0.5 mM isopropyl  $\beta$ -D-thiogalactoside (IPTG). After growth at  $16^\circ\text{C}$  for 18 h, cells were harvested by using centrifugation at 4,200 *g*. Cells were resuspended in ice-cold buffer A (20 mM Tris-HCl (pH 8.0), 300 mM NaCl, and 10% (v/v) glycerol) and subjected to two runs of homogenization at 10,000–15,000 psi using an EmulsiFlex-C3 homogenizer (AVESTIN, Canada). The homogenate was centrifuged at 17,000 *g* for 15 min at  $4^\circ\text{C}$ , and then the supernatant was ultra-centrifuged at 100,000 *g* for 90 min. The membrane fraction was resuspended in buffer A supplemented with 1% (w/v) DDM (Anatrace, US) and was slowly stirred for 2 h at  $4^\circ\text{C}$ . After another ultracentrifugation at 100,000 *g* for 30 min, the supernatant was collected and loaded on 2 ml of  $\text{Ni}^{2+}$ -nitrilotriacetate affinity resin (Ni-NTA from Qiagen, Germany) pre-equilibrated with buffer A supplemented with 5 mM imidazole and 0.03% (w/v) DDM. After incubating for 1 h, the resin was washed with 50 ml buffer A supplemented with 20 mM imidazole, and 0.03% (w/v) DDM. The protein sample was eluted with 15 ml elution buffer containing buffer A, 200 mM imidazole, and 0.03% (w/v) DDM, and was concentrated to 500  $\mu\text{l}$ . The concentrated protein sample was then loaded onto a Superdex-200 column (10/30, GE Healthcare, US) pre-equilibrated with 20 mM Tris-HCl (pH 8.0), 100 mM NaCl, and a detergent (*e.g.*  $\beta$ -NG) at 2x CMC. Peak fractions were collected, and the pooled protein sample was concentrated to 20 mg/ml before carrying out crystallization trials. The yield was typically 6 mg protein per liter of cell culture.

To obtain a seleno-methionine derivative protein, the transformed *E. coli* C43 (DE3) strain was grown in minimal medium with seleno-L-methionine replacing methionine, and purified in the same manner as the native protein.

##### Crystallization

Initial crystallization trials were carried out at  $16^\circ\text{C}$  using commercial crystallization screening kits from Molecular Dimension (UK) and Hampton Research (US) and the hanging-drop vapor-diffusion method. Protein crystals

appeared in the presence of detergents DDM, decyl- $\beta$ -D-maltopyranoside (DM), nonyl- $\beta$ -D-maltopyranoside (NM), nonyl- $\beta$ -D-thiomaltopyranoside (NTM), 6-cyclohexyl-1-hexyl- $\beta$ -D-maltoside (Cymal-6), octaethylene glycol monododecyl ether (C<sub>12</sub>E<sub>8</sub>), and  $\beta$ -NG (Anatrace). While most crystals showed diffractions up to only 7–8 Å resolutions, crystals grown with  $\beta$ -NG diffracted significantly better on a synchrotron beamline. After optimization, hexagonal rod shaped crystals appeared in 1–2 d and reached full size (typically 200 x 80 x 80  $\mu$ m<sup>3</sup>) in 10 d with a reservoir solution of 0.1 M Na-acetate (pH 5.0–5.3), 25–29% (v/v) PEG300. Crystals were directly flash-cooled in liquid nitrogen for storage and data collection.

For heavy atom derivatives, native crystals were soaked in mother liquor containing 0.1 M Na-acetate (pH 5.1), 30% (v/v) PEG300, 1% (w/v)  $\beta$ -NG, and 2–10 mM Hg(CN)<sub>2</sub> overnight. Se-Met derivative crystals were grown under the same condition as the native crystals.

#### Data collection and structure determination

Diffraction data for the native YajR crystal were collected up to 3.15 Å resolution at the 17U beamline of the Shanghai Synchrotron Radiation Facility (SSRF). All anomalous data sets, including Hg(CN)<sub>2</sub>-soaked derivatives and seleno-L-methionine derivatives, were collected at the 41XU beamline of SPring-8 facility (Japan). All data were processed with *HKL2000* (8).

Two mercury atoms in the Hg-derivative crystal of the wild type protein were located using *Shelx-C/D/E* (9) and initial phases were calculated using *Phenix.autosol* (10) with a two-wavelength MAD data set. A crude YajR model containing 12 transmembrane helices was built manually using *Coot* (11). Building of amino-acid side chains was facilitated with selenium and mercury sites as markers to ensure correct fitting of the a.a. sequence to the peptide model. A significant improvement in the map quality was achieved by multi-crystal averaging using the native, mercury-, and selenium-derivative data sets. Refinement of the model was carried out with *Phenix* (the phased maximum likelihood method) using the highest resolution data set available supplemented with the experimental phase information. Strong secondary structure restraint and reference-model restraint were used throughout the entire refinement. Model validation was carried out using the *Molprobity* server (12). In the final refined model, only one residue, Thr7, was associated with disallowed regions of the Ramachandran plot and was located in the N-terminal flexible region with weak electron density.

#### Thermofluor stability assay

Thermofluor analysis (13) was performed with a qPCR instrument, Rotor-Gene 6600 (Corbett Research, Australia) equipped with both a blue and a green fluorescence channel. Thiol-specific fluorochrome N-[4-(7-(diethylamino-4-methyl-3-coumarinyl) phenyl)] maleimide (CPM, Invitrogen, US) was used as the fluorescence probe for full length YajR and

YajR- $\Delta$ YAM. Using the blue light channel, CPM fluorescence was measured with a 387 nm excitation and a 463 nm emission wavelength (14). In addition, Sypro orange dye (Invitrogen) was used together with the green fluorescence channel (*i.e.* 492 nm excitation and 516 nm emission) for the isolated YAM domain protein sample which was soluble but contained no Cys residue. The protein samples (*ca.* 4  $\mu$ g/ $\mu$ l) were typically diluted from one buffer (*i.e.* 20 mM Tris-HCl (pH 8.0), 100 mM NaCl, and 0.03% (w/v) DDM for YajR and YajR- $\Delta$ YAM; and 20 mM MES (pH 6.0) and 100 mM NaCl for YAM) into the buffer to be analyzed at a 1:20 ratio. The volume of each sample was 20  $\mu$ l, and the final concentration of the protein was 0.2  $\mu$ g/ $\mu$ l. Buffers tested included sodium acetate, MES, HEPES, Tris, and bicine. The pH range varied from 5 to 10, and the salt concentration varied from 0.1 to 2.0 M. The qPCR instrument was programmed to increase temperature from 25 to 99°C at a rate of 1°C/min. Melting temperature, T<sub>m</sub>, was estimated to be the temperature corresponding to the minimum of the first derivative of the denaturation curve.

#### Disulfide bond formation assay

Membrane fractions of *E. coli* cells expressing the wild type YajR or mutation variants were collected each from 5 ml of freshly prepared cell culture. After resuspended in 400  $\mu$ l of buffer A (20 mM Tris-HCl (pH 8.0), 300 mM NaCl, and 10% (v/v) glycerol), each membrane sample was divided into 20- $\mu$ l aliquots. Each sample was incubated with 2 mM (final) copper phenanthroline (Sigma, US) for 1 h at 30°C. For reducing controls, samples were incubated with additional 50 mM (final) dithiothreitol (DTT) for 10 min at 30°C. All samples were subjected to sodium dodecyl sulfate-10% polyacrylamide gel electrophoresis (SDS-10% PAGE) with 5 min pre-heating at 37°C. Immuno-blotting was performed with anti-His antibodies (Tagmouse monoclonal antibody) and HRP-goat anti-mouse IgG antibodies (both from EarthOx, US). Experiments were repeated multiple times, and the results were reproducible. Representative results are shown in Fig. 2B.

#### References

1. Eilers M, Patel AB, Liu W, & Smith SO (2002) Comparison of helix interactions in membrane and soluble alpha-bundle proteins. *Biophys J* 82(5):2720-2736.
2. Nicholson H, Becktel WJ, & Matthews BW (1988) Enhanced protein thermostability from designed mutations that interact with alpha-helix dipoles. *Nature* 336(6200):651-656.
3. Huang Y, Lemieux MJ, Song J, Auer M, & Wang DN (2003) Structure and mechanism of the glycerol-3-phosphate transporter from *Escherichia coli*. *Science* 301(5633):616-620.
4. Abramson J, *et al.* (2003) Structure and mechanism of the lactose permease of *Escherichia coli*. *Science* 301(5633):610-615.
5. Zimmermann M, *et al.* (2009) Metal binding affinities of Arabidopsis zinc and copper transporters: selectivities match the relative, but not

- the absolute, affinities of their amino-terminal domains. *Biochemistry* 48(49):11640-11654.
6. Fan J, *et al.* (2011) An efficient strategy for high throughput screening of recombinant integral membrane protein expression and stability. *Protein Expr Purif.*
  7. Miroux B & Walker JE (1996) Over-production of proteins in *Escherichia coli*: mutant hosts that allow synthesis of some membrane proteins and globular proteins at high levels. *J Mol Biol* 260(3):289-298.
  8. Otwinowski Z & Minor W (1997) Processing of X-ray Diffraction Data Collected in Oscillation Mode. *Methods in Enzymology* 276(Macromolecular Crystallography, part A):307-326.
  9. Schneider TR & Sheldrick GM (2002) Substructure solution with SHELXD. *Acta Crystallogr D Biol Crystallogr* 58(Pt 10 Pt 2):1772-1779.
  10. Adams PD, *et al.* (2010) PHENIX: a comprehensive Python-based system for macromolecular structure solution. *Acta Crystallogr D Biol Crystallogr* 66(Pt 2):213-221.
  11. Emsley P & Cowtan K (2004) Coot: model-building tools for molecular graphics. *Acta Crystallogr D Biol Crystallogr* 60(Pt 12 Pt 1):2126-2132.
  12. Davis IW, Murray LW, Richardson JS, & Richardson DC (2004) MOLPROBITY: structure validation and all-atom contact analysis for nucleic acids and their complexes. *Nucleic Acids Res* 32(Web Server issue):W615-619.
  13. Cummings MD, Farnum MA, & Nelen MI (2006) Universal screening methods and applications of ThermoFluor. *J Biomol Screen* 11(7):854-863.
  14. Alexandrov AI, Mileni M, Chien EY, Hanson MA, & Stevens RC (2008) Microscale fluorescent thermal stability assay for membrane proteins. *Structure* 16(3):351-359.
  15. Thompson JD, Gibson TJ, & Higgins DG (2002) Multiple sequence alignment using ClustalW and ClustalX. *Current protocols in bioinformatics / editorial board, Andreas D. Baxevanis ... [et al.]* Chapter 2:Unit 2.3.
  16. Gouet P, Robert X, & Courcelle E (2003) ESPript/ENDscript: Extracting and rendering sequence and 3D information from atomic structures of proteins. *Nucleic Acids Res* 31(13):3320-3323.
  17. McGuffin LJ, Bryson K, & Jones DT (2000) The PSIPRED protein structure prediction server. *Bioinformatics* 16(4):404-405.
  18. Crooks GE, Hon G, Chandonia JM, & Brenner SE (2004) WebLogo: a sequence logo generator. *Genome Res* 14(6):1188-1190.
  19. Sonnhammer EL, Eddy SR, Birney E, Bateman A, & Durbin R (1998) Pfam: multiple sequence alignments and HMM-profiles of protein domains. *Nucleic Acids Res* 26(1):320-322.
  20. Finn RD, Clements J, & Eddy SR (2011) HMMER web server: interactive sequence similarity searching. *Nucleic Acids Res* 39(Web Server issue):W29-37.
  21. Jones DT, Taylor WR, & Thornton JM (1994) A model recognition approach to the prediction of all-helical membrane protein structure and topology. *Biochemistry* 33(10):3038-3049.

# Figures

A

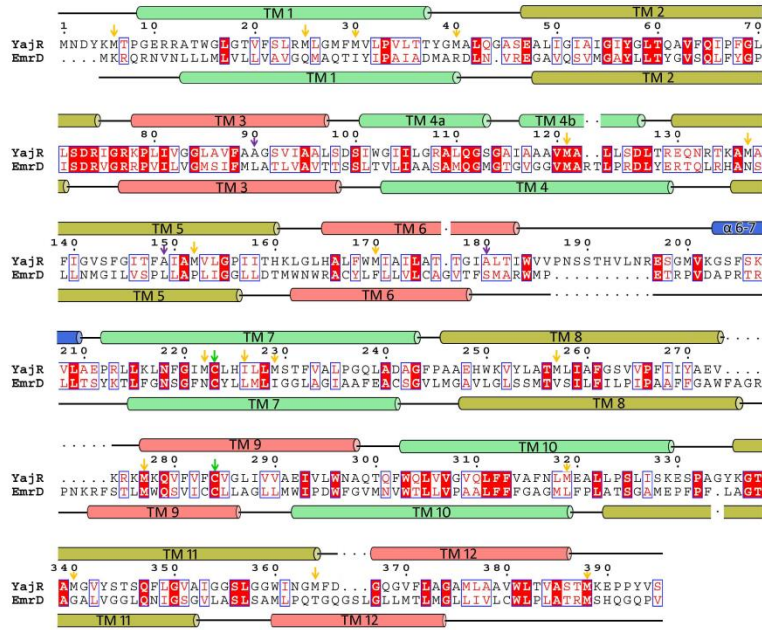

B

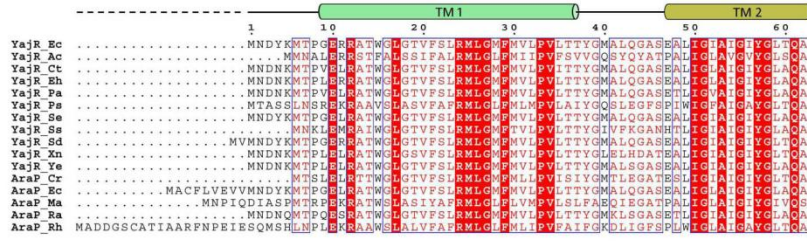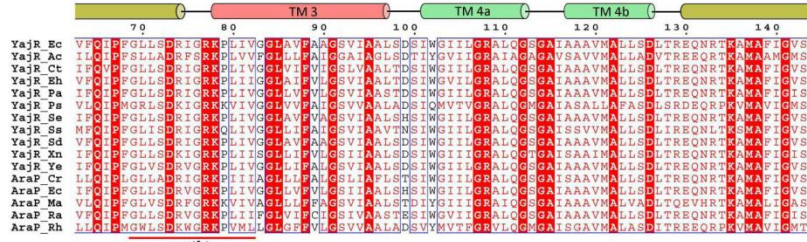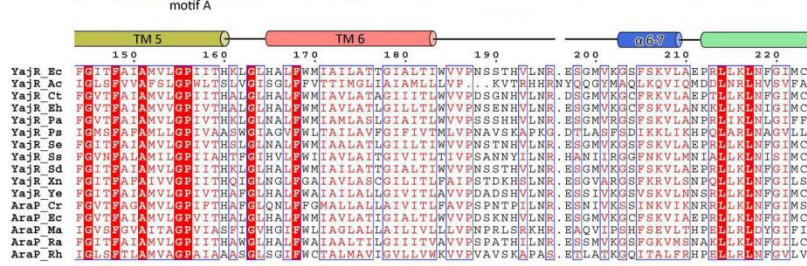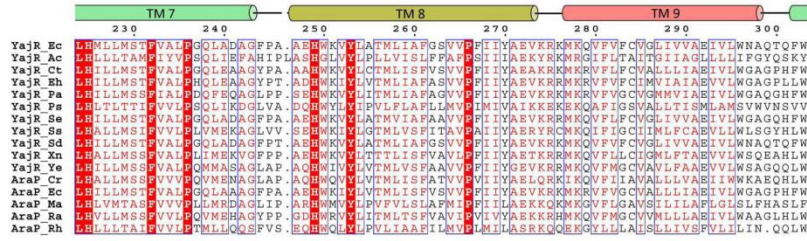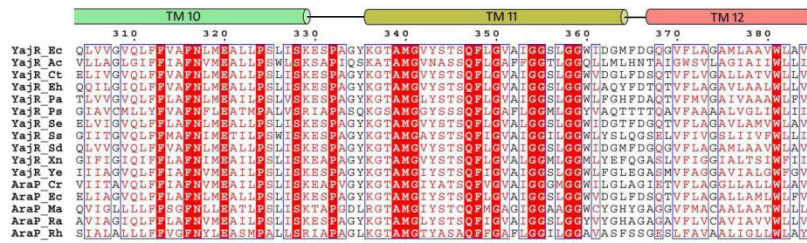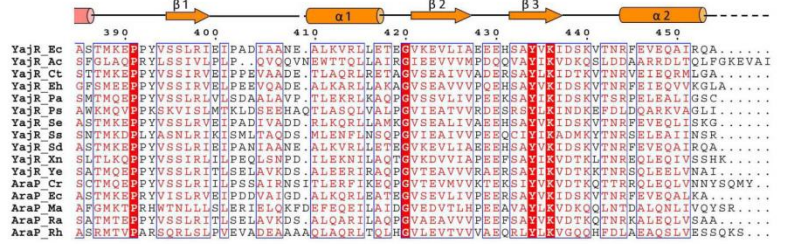

**Figure S1.** Amino acid sequence analysis of *E. coli* YajR. *A.* Alignment of primary sequences of YajR and EmrD. Corresponding secondary structure elements are marked above and below the sequences, respectively. Positions of observed Se-Met residues in the crystal are indicated with orange arrows, and native and engineered Cys residues binding Hg-atoms are indicated with green and purple arrows, respectively. *B.* Alignment of sequences of YajR and AraP from a variety of Gram negative bacteria. YajR\_Ec: *E. coli*; YajR\_Sd: *Shigella dysenteriae*; YajR\_Se: *Salmonella enteria*; YajR\_Ct: *Cronobacter turicensis*; YajR\_Eh: *Escherichia hermannii*; YajR\_Pa: *Pantoea anantis*; YajR\_Ye: *Yersinia enterocolitica*; YajR\_Xn: *Xenorhabdus nematophila*; YajR\_Ss: *Serratia symbiotica*; YajR\_Ps: *Pseudoalteromonas*; YajR\_Ac: *Acinetobacter calcoaceticus*; AraP\_Ec: *Enterobacter cloacae*; AraP\_Ra: *Rahnella aquatilis*; AraP\_Cr: *Candidatus Regiella insecticola*; AraP\_Rh: *Rheinheimera*; and AraP\_Ma: *Methylomicrobium album*. Identical and similar residues are colored in white on red background and in red on white background, respectively. The secondary structural elements of *E. coli* YajR are indicated above the sequence alignment and color coded as in Fig. 1B, along with selected residue position numbers. Conserved motifs A and B of MFS transporters are marked below the sequences. Sequences were aligned with the program ClustalX (15) and formatted with ESPript (16) .

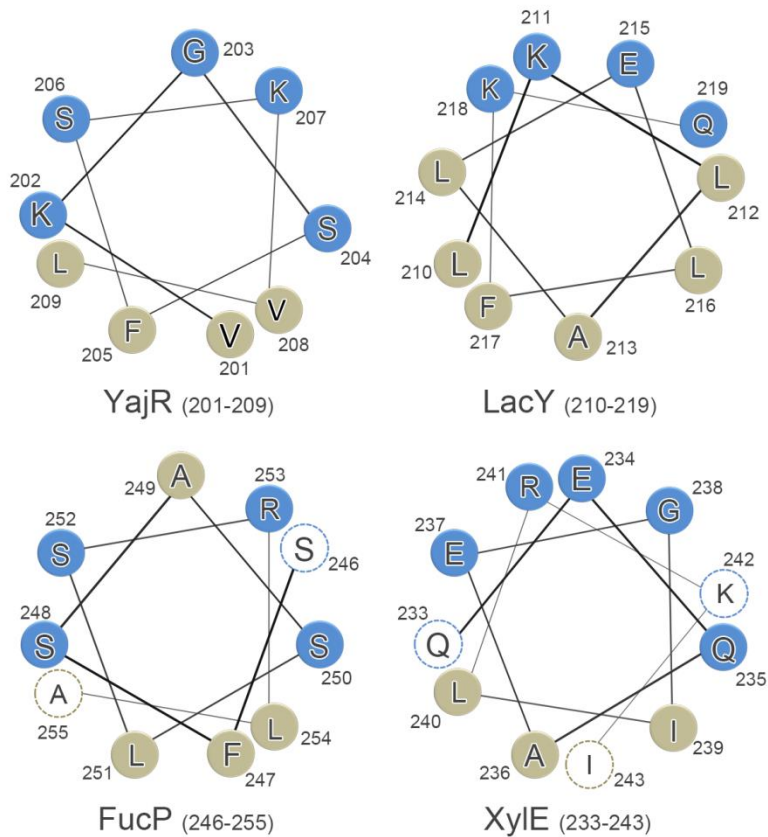

**Figure S2.** Helix wheels of the amphipathic helices ( $\alpha$ 6-7) in the inter-domain linkers of known structures of MFS proteins. Polar residues are shown in blue color circle, and hydrophobic residues are in wheat color. Potential terminal residues that fit the pattern are included in open circles. Note that the structures of PepT<sub>St</sub> and PepT<sub>So</sub> contain an insertion of a TM helix pair instead of an amphipathic  $\alpha$ -helix; and the EmrD/2GFP structure does not show an amphipathic  $\alpha$ -helix (albeit a 3-turn amphipathic helix can be predicted in the linker region using the PSIPRED server (17)). Thus, these three structures are not included.



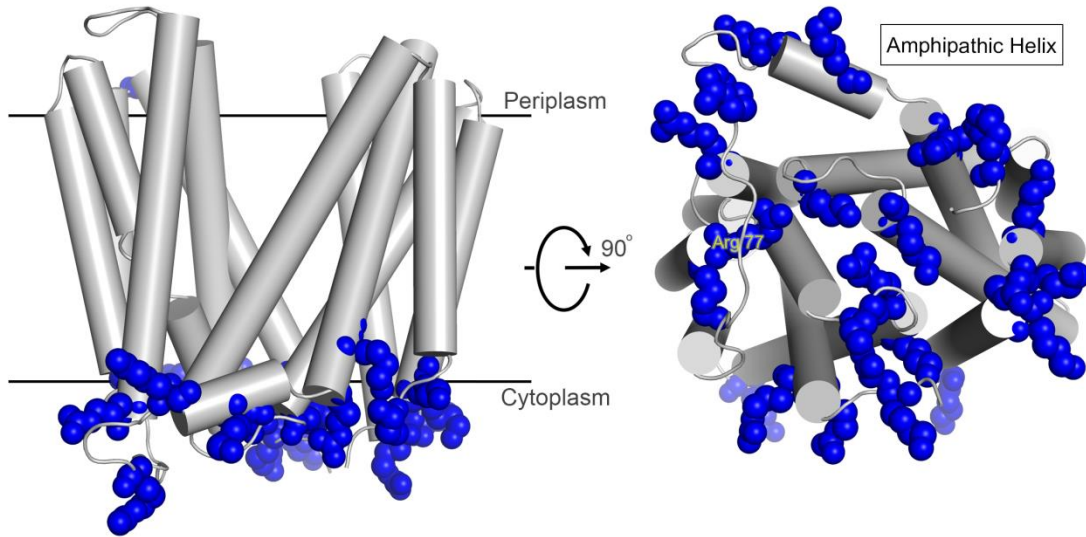

**Figure S3.** Distribution of basic amino acid residues in the TM core of YajR. The transmembrane core is shown in a cartoon presentation, and basic residues in space filling models. The distribution clearly follows the positive-inside rule.

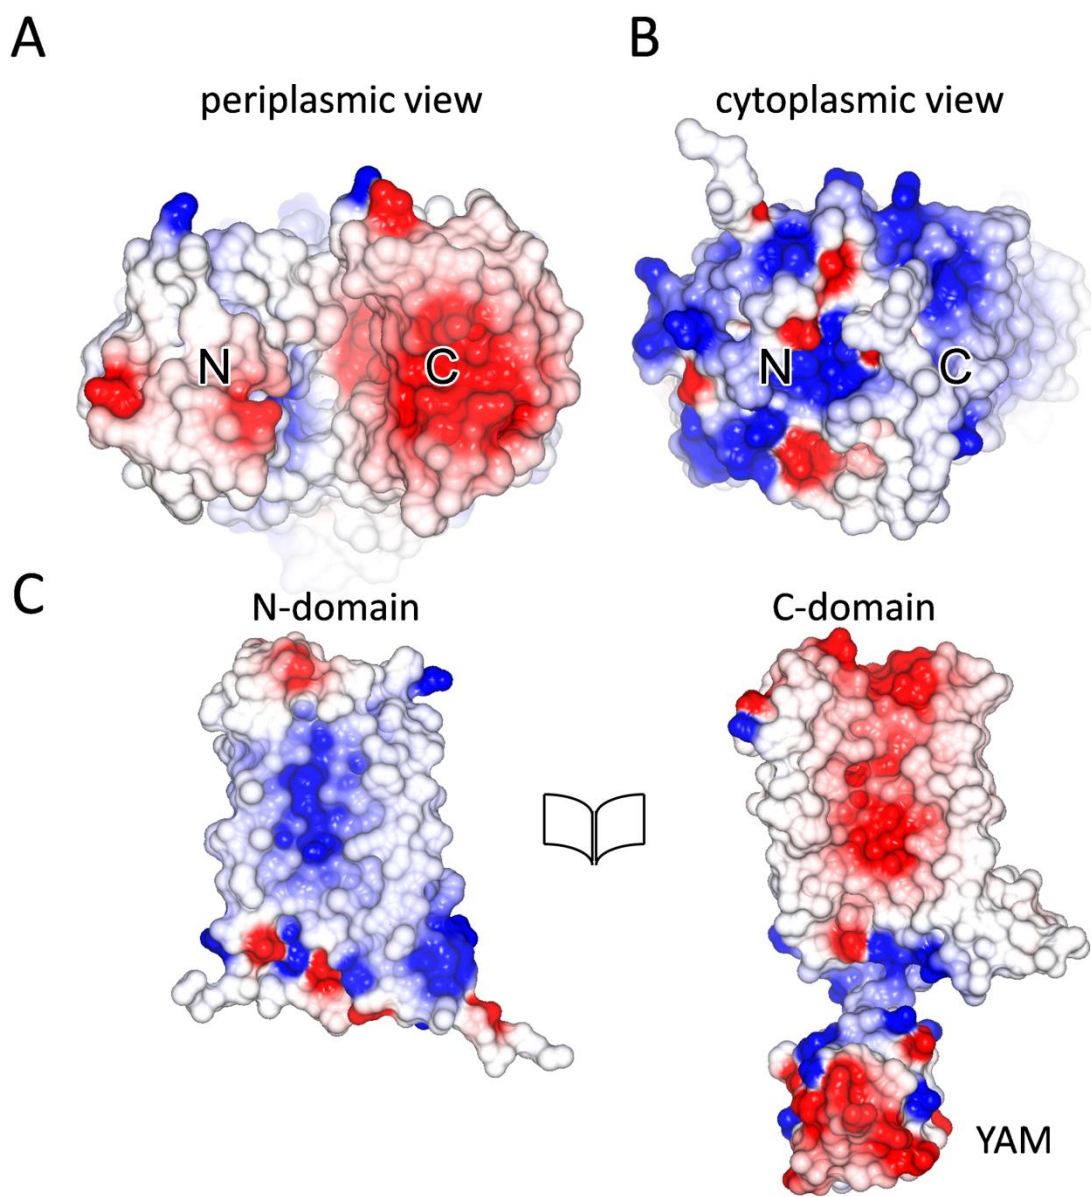

**Figure S4.** Molecular surface of YajR color-coded for electrostatic potential. *A.* View from the periplasmic side. *B.* View from the cytoplasmic side (without the YAM domain). *C.* An open-book view of the central cavity. All surface figures were generated using the default settings in *Coot*. The positively charged region is in blue and the negatively charged region in red.

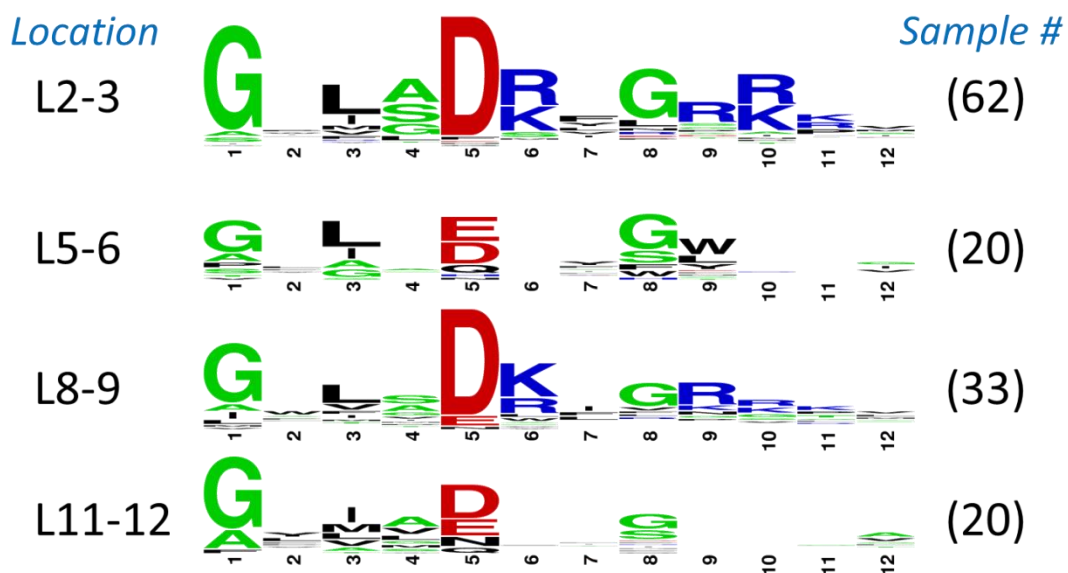

**Figure S5.** Conservativeness of A-like motifs in *E. coli* MFS transporters. Data were from Table S4. The higher the frequency of a residue occurs at a given position, the larger the letter size is. Short side chain residues (*i.e.* Gly, Ala, Ser, and Thr) are in green; acidic residues (Asp and Glu) in red; basic residues (Arg, Lys, and His) in blue; and the rest in black. The figure was generated with the web program WebLogo (18).

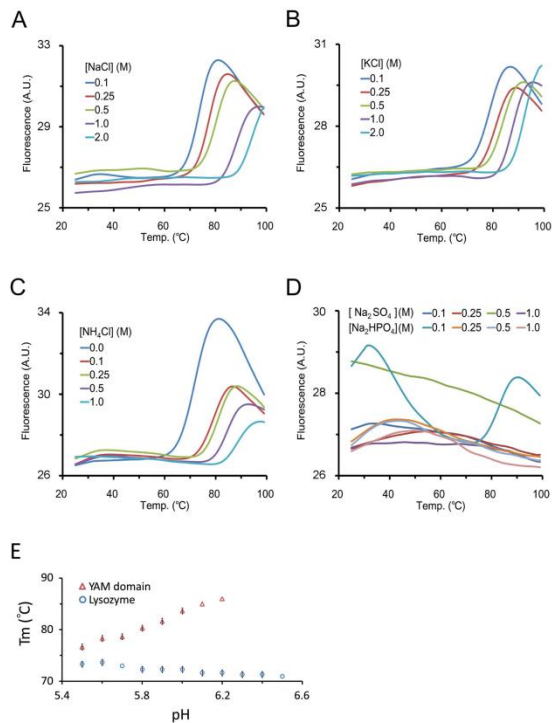

**Figure S6.** Thermal stability of YAM domain of YajR. Thermal denaturation curves of YAM domain were measured using the green fluorescence of Sypro Orange dye (Invitrogen). *A.* Effects of NaCl concentration on YAM thermal stability. *B.* Effects of KCl concentration. *C.* Effects of NH<sub>4</sub>Cl concentration. *D.* Effects of sodium salts. In panel *A–D*, the buffers contained 50 mM MES (pH 6.0) and specified salt. Multiple measurements were performed, and the results were reproducible. Raw data from a representative measurement are shown. *E.* Effects of pH on YajR YAM thermal stability. Buffers contained 50 mM MES at specified pH and 100 mM NaCl. At pH higher than 6.2, the fluorescence signal diminished. Chicken egg white lysozyme was used as a control under identical conditions as the YAM sample. Error bars were calculated based on two or more independent measurements.

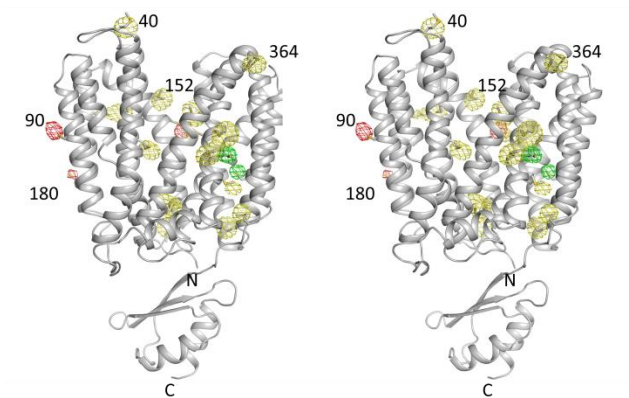

**Figure S7.** Stereo view of heavy atom positions. Yellow chicken wires represent electron densities from a seleno anomalous difference *Fourier* map contoured at  $3.5 \sigma$  level, and they indicate positions of Se atoms in the Se-Met derivative of YajR. Similarly, green and magenta chicken wires represent electron densities from mercury anomalous difference *Fourier* map contoured at  $5.0 \sigma$ , indicating positions of mercury atoms bound to cysteine residues of the native and Ala-to-Cys point mutation crystals, respectively.

# Tables

**Table S1. Statistics from data collection and refinement**

|                                                        | Native                              | Hg(CN) <sub>2</sub>    |                        | Se<br>peak             | A90C<br>Hg(CN) <sub>2</sub><br>peak | A180C<br>Hg(CN) <sub>2</sub><br>peak |
|--------------------------------------------------------|-------------------------------------|------------------------|------------------------|------------------------|-------------------------------------|--------------------------------------|
|                                                        |                                     | peak                   | inflection             |                        |                                     |                                      |
| <b>Data processing</b>                                 |                                     |                        |                        |                        |                                     |                                      |
| Beamline                                               | BL17U<br>at SSRF                    | BL41XU<br>at SPring-8  |                        | BL41XU<br>at SPring-8  | BL41XU<br>at SPring-8               | BL41XU<br>at SPring-8                |
| Wavelength (Å)                                         | 0.9200                              | 1.0063                 | 1.0089                 | 0.9791                 | 1.0063                              | 1.0063                               |
| Space group                                            | P6 <sub>1</sub> 22                  | P6 <sub>1</sub> 22     |                        | P6 <sub>1</sub> 22     | P6 <sub>1</sub> 22                  | P6 <sub>1</sub> 22                   |
| Cell dimensions<br><i>a = b, c</i> (Å)                 | 128.7, 165.1                        | 128.9, 166.7           |                        | 128.7, 163.9           | 128.1, 164.4                        | 128.8, 164.2                         |
| Resolution (Å)                                         | 50–3.15<br>(3.26–3.15) <sup>a</sup> | 50–4.20<br>(4.35–4.20) | 50–4.50<br>(4.66–4.50) | 50–3.70<br>(3.83–3.70) | 50–3.75<br>(3.88–3.75)              | 50–3.70<br>(3.83–3.70)               |
| Completeness (%)                                       | 99.6 (100)                          | 99.5 (100)             | 99.5 (100)             | 98.8 (96.0)            | 98.7 (100)                          | 98.9 (99.8)                          |
| R <sub>merge</sub> (%) <sup>b</sup>                    | 8.9 (99.5)                          | 20.3 (91.0)            | 17.8 (66.5)            | 13.0 (>100)            | 12.7 (>100)                         | 12.0 (79.1)                          |
| <i>I</i> / σ( <i>I</i> )                               | 22.9 (2.2)                          | 11.0 (2.1)             | 12.8 (3.7)             | 10.7 (1.5)             | 14.7 (2.5)                          | 20.1 (3.3)                           |
| Unique reflections                                     | 14,541 (1,419)                      | 6,308 (608)            | 5,275 (510)            | 9,017 (847)            | 8,636 (838)                         | 9,049 (876)                          |
| Redundancy                                             | 7.9 (7.4)                           | 12.1 (11.1)            | 12.1 (11.0)            | 5.5 (4.6)              | 13.2 (11.0)                         | 13.9 (13.9)                          |
| <b>Refinement</b>                                      |                                     |                        |                        |                        |                                     |                                      |
| Resolution (Å)                                         | 39–3.15                             |                        |                        |                        |                                     |                                      |
| No. of reflections (test)                              | 14,472 (707)                        |                        |                        |                        |                                     |                                      |
| R <sub>work</sub> / R <sub>free</sub> (%) <sup>c</sup> | 27.1 / 29.0                         |                        |                        |                        |                                     |                                      |
| Average <i>B</i> -factor (Å <sup>2</sup> )             | 66                                  |                        |                        |                        |                                     |                                      |
| Rmsd                                                   |                                     |                        |                        |                        |                                     |                                      |
| bond lengths (Å)                                       | 0.011                               |                        |                        |                        |                                     |                                      |
| bond angles (°)                                        | 1.800                               |                        |                        |                        |                                     |                                      |
| Ramachandran plot (%) <sup>d</sup>                     |                                     |                        |                        |                        |                                     |                                      |
| favored region                                         | 92.5                                |                        |                        |                        |                                     |                                      |
| allowed region                                         | 7.3                                 |                        |                        |                        |                                     |                                      |
| disallowed region                                      | 0.2                                 |                        |                        |                        |                                     |                                      |

<sup>a</sup> Values in parentheses are for the highest resolution shell. <sup>b</sup>  $R_{\text{merge}} = \sum_{hkl} \sum_i |I_i - \langle I \rangle| / \langle I \rangle$  where  $I_i$  is the intensity for the  $i$ th measurement of an equivalent reflection with indices  $h, k, l$ .

<sup>c</sup>  $R = \sum |F_o - F_c| / \sum |F_o|$  where  $F_o$  and  $F_c$  are the observed and calculated structure factors, respectively.

<sup>d</sup> Calculated using *MolProbity*.

**Table S2.** Patterns of short side chain distribution in TM helices of YajR.

| No. | Pattern                                                                               | Position | Helix | Contact                                         |
|-----|---------------------------------------------------------------------------------------|----------|-------|-------------------------------------------------|
| 1   | <u>A</u> L <u>I</u> G <u>I</u> A <u>I</u> G <u>I</u> Y <u>G</u> L <u>T</u> Q <u>A</u> | 48–62    | TM2   | TM11 (potentially inter-domain w/ #11)          |
| 2   | <u>G</u> G <u>L</u> A <u>V</u> F <u>A</u> A <u>G</u> S <u>V</u> I <u>A</u> A          | 83–96    | TM3   | TM4 (#3) and TM6                                |
| 3   | <u>S</u> I <u>W</u> G <u>I</u> I <u>L</u> G                                           | 100–107  | TM4a  | TM3 (#2)                                        |
| 4   | <u>A</u> A <u>V</u> M <u>A</u> L <u>L</u> S                                           | 117–125  | TM4b  | TM2 (motif A) & TM11 (inter-domain w/ #10)      |
| 5   | <u>T</u> K <u>A</u> M <u>A</u> F <u>I</u> G <u>V</u> S <u>F</u> G                     | 134–145  | TM5   | TM10 (inter-domain w/ #9)                       |
| 6   | <u>A</u> T <u>T</u> G <u>I</u> A <u>L</u> T                                           | 175–182  | TM6   | TM1                                             |
| 7   | <u>S</u> T <u>F</u> V <u>A</u> L <u>P</u> G                                           | 230–237  | TM7   | TM11 (#11) & TM12                               |
| 8   | <u>T</u> M <u>L</u> I <u>A</u> F <u>G</u> S                                           | 256–263  | TM8   | TM10                                            |
| 9   | <u>A</u> L <u>L</u> L <u>S</u> L <u>I</u> S                                           | 321–328  | TM10  | TM5 (inter-domain w/ #5)                        |
| 10  | <u>G</u> T <u>A</u> M <u>G</u> V <u>Y</u> S <u>T</u>                                  | 337–344  | TM11  | TM2 (inter-domain w/ motif A) & TM4 (#4)        |
| 11  | <u>A</u> I <u>G</u> G <u>S</u> L <u>G</u> G                                           | 352–359  | TM11  | TM2 (potentially inter-domain w/ #1) & TM7 (#7) |
| 12  | <u>A</u> V <u>W</u> L <u>A</u> V <u>A</u> S                                           | 379–386  | TM12  |                                                 |

Location of the patterns:

```

MNDYKMTFGE RRATWGLGTV FSLRMLGMFM VLPVLTYYGM ALQGASEALI GIAIGYGLT
QAVFQIPFGL LSDRIGRRKPL IVGGLAVFAA GSVIAALSDS IWGIILGRAL QGSGAIAAV
MALLSDLTRE QNRTKAMAFI GVSFGITFAI AMVLGPPIITH KLGLHALFWM IAILATTGLA
LIIWVVPNSS THVLNRESGM VKGSFSKVLA EPRLLKLNFG IMCLHMLLMS TFVALPGQLA
DAGFPAAEHW KVYLATMLIA FGSVVPPFIY AEVKRRMKQV FVFCVGLIVV AEIVLWNAQT
QFWQLVVGVQ LFFVAFNLME ALLPSLISKE SPAGYRGTAM GVYSTSQFLG VAIGGSLGGW
IDGMFDGQGV FLAGAMAAV WLAVASTMKE PPYVSSLRIE IPADIAANEA LKVRLELETEG
VKEVLIABEE HSAYVKIDSK VTNRFEVEQA IRQA

```

*Table S3. A-like motifs in known structures of MFS proteins*

| Protein                           | PDB ID                 | Location                    | A-like motif*                                                  | Putative charge-relay system* |
|-----------------------------------|------------------------|-----------------------------|----------------------------------------------------------------|-------------------------------|
| YajR<br>(antiporter)              | 4XYZ<br>(outward)      | L2-3; obs.                  | <u>G</u> LLSD <sup>73</sup> <u>R</u> IGR <u>K</u> P            | Asp73-Arg77-Asp126            |
|                                   |                        | L8-9; obs.                  | I IFAE <sup>272</sup> VKR <u>K</u> MK                          | Glu272-Lys329-Glu130          |
| LacY<br>(symporter)               | 1PV7<br>(inward)       | L2-3                        | <u>G</u> LLSD <sup>68</sup> <u>K</u> LGLR <u>K</u>             | Asp68-Lys131-Glu130           |
|                                   |                        | L11-12; obs.<br>periplasmic | <u>G</u> NMYE <sup>374</sup> SIG <u>F</u> Q <u>G</u>           | none                          |
| GlpT<br>(Pi <sup>-</sup> antip.)  | 1PW4<br>(inward)       | L8-9                        | <u>G</u> WMSD <sup>314</sup> <u>K</u> VFRG <u>N</u> R <u>G</u> | Asp314-Arg321-Glu374          |
|                                   |                        | L11-12; obs.<br>periplasmic | <u>G</u> YTV <u>D</u> <sup>409</sup> FFG <u>W</u> D <u>G</u>   | none                          |
| EmrD<br>(antiporter)              | 2GFP<br>(intermediate) | L2-3                        | <u>G</u> PISD <sup>68</sup> <u>R</u> VGR <u>R</u> P            | Asp68-Arg72-Asp123            |
| PepTs <sub>o</sub><br>(symporter) | 2XUT<br>(inward)       | L2-3                        | <u>G</u> WIAD <sup>79</sup> <u>R</u> FFG <u>K</u> Y <u>N</u>   | Asp79-Lys84-Asp136            |
| FucP<br>(symporter)               | 3O7Q<br>(outward)      | L11-12<br>periplasmic       | <u>G</u> FVSD <sup>406</sup> AAG <u>N</u> I <u>P</u>           | none                          |
| PepT <sub>st</sub><br>(symporter) | 4APS<br>(inward)       | L2-3                        | <u>G</u> FVAD <sup>79</sup> <u>R</u> IIG <u>A</u> R <u>P</u>   | Asp79-Arg80-Asp210            |
|                                   |                        | L5-6; obs.<br>periplasmic   | <u>G</u> AANE <sup>171</sup> AAGY <u>H</u> V                   | none                          |
| XylE<br>(symporter)               | 4GC0<br>(outward)      | L2-3; obs.                  | <u>G</u> YCSN <sup>80</sup> <u>R</u> FG <u>R</u> RD            | Asn80-Arg84-Glu153            |
|                                   |                        | L8-9; obs.                  | I <u>M</u> TVD <sup>337</sup> <u>K</u> FG <u>R</u> K <u>P</u>  | Asp337-Arg341-Glu397          |
| PiPT<br>(symporter)               | 4J05<br>(intermediate) | L2-3                        | <u>G</u> VLGD <sup>97</sup> <u>S</u> FGR <u>K</u>              | none                          |
|                                   |                        | L8-9; obs.                  | <u>L</u> FLID <sup>381</sup> IVGR <u>K</u> K                   | Asp381-Arg385-Glu440          |
| NarK<br>(exchanger)               | 4JRE<br>(intermediate) | L8-9; obs.                  | <u>G</u> ALSD <sup>313</sup> <u>R</u> LG <u>G</u> TR           | none                          |
| NarU<br>(exchanger)               | 4IU9<br>(intermediate) | L8-9; obs.                  | <u>G</u> AISD <sup>311</sup> <u>K</u> FG <u>G</u> V <u>R</u>   | none                          |

\*These structural features were identified based on visual investigation of 3D structures, complemented by manual analysis of the primary sequences.



**Table S4.** Distribution of potential A-like motifs in MFS proteins from *E. coli*.

| protein     | ID     | # res. | # TM | L2-3         | #  | TM4 -C | L5-6         | #   | L8-9         | #   | TM10 -C | L11-12       | #   |
|-------------|--------|--------|------|--------------|----|--------|--------------|-----|--------------|-----|---------|--------------|-----|
| AMPG        | P0AE16 | 491    | 14   | SPLMDRYTPPF  | 66 | FDAW   |              |     | LSITDKHLYSMG | 308 | LEYT    |              |     |
| ARAE        | P0AE24 | 472    | 12   | GWLSFRLGRKYS | 80 | SEMA   | AFLSDTAFSYSG | 164 | VFTVDKAGRKPA | 315 | SEIQ    |              |     |
| <b>ARAJ</b> | P23910 | 394    | 12   |              |    |        |              |     |              |     |         |              |     |
| BCR         | P28246 | 396    | 12   | GPMADSFGRKPV | 66 | RDYI   |              |     |              |     |         |              |     |
| <b>CYNX</b> | P17583 | 384    | 12   |              |    |        |              |     |              |     |         |              |     |
| DGOT        | P0AA76 | 430    | 12   | GWFLDRVGSRV  | 72 | QEML   |              |     | GWVADLLVRKGF | 297 |         |              |     |
| DTPA        | P77304 | 500    | 14   | GWLGDKVLGTR  | 78 |        |              |     | AAIYNKMGDTLP | 337 |         |              |     |
| DTPB        | P36837 | 489    | 14   | GYVGDHLLGTR  | 71 |        | PVIADRFGYSVT | 164 | AFKLDKTGRNKM | 257 |         |              |     |
| DTPD        | P75742 | 493    | 14   | GFLADKVLGNRM | 66 | GELY   | GYAQEEYSWAMG | 159 |              |     |         | GVIADQTSQASF | 431 |
| EMRB        | P0AEJ0 | 512    | 14   |              |    |        | GYISDNYHWGWI | 159 |              |     |         |              |     |
| EMRD        | P31442 | 394    | 12   | GPISDRVRRPV  | 64 | RDLY   | GGLLDTMWNWRA | 152 |              |     |         |              |     |
| EMRY        | P52600 | 512    | 14   | GRLAQRIGELRL | 74 | LDVL   | GYICDNFSWGWI | 163 |              |     |         |              |     |
| ENTS        | P24077 | 416    | 12   | GVLADRYERKKV | 73 | RENL   |              |     |              |     |         |              |     |
| EXUT        | P0AA78 | 472    | 12   |              |    |        |              |     |              |     |         | GALADTIGFSPL | 416 |
| FSR         | P52067 | 406    | 12   | GYWTDKYPMPWS | 81 |        |              |     | GPVGDKIGRKYV | 284 | QELL    | GLIADHTSIELV | 371 |
| FUCP        | P11551 | 438    | 12   |              |    |        |              |     |              |     |         | GFVSDAAGNIPT | 397 |
| GALP        | P0AEP1 | 464    | 12   | GWLSFKLGRKKS | 73 | SEIA   |              |     | IGLVDRWGRKPT | 308 | SEIQ    |              |     |
| GARP        | P0AA80 | 444    | 12   | GWLLDKFGSKKV | 74 |        | AWGWEHVFTVMG | 174 | GVFSDYLIKRG  | 307 | SDTA    |              |     |
| GLPT        | P08194 | 452    | 12   | GSVSDRSNPRVF | 84 |        |              |     | GWMSDKVFRGNR | 310 | LELA    | GYTVDFFGWDGG | 400 |
| HSRA        | P31474 | 475    | 12   | GWLADRFGTRRI | 66 |        | SSGIELFGEKIV | 212 |              |     |         |              |     |
| KGTP        | P0AEX3 | 432    | 12   | GRIADKHGRKKS | 84 | GEYG   |              |     | GALSDKIGRRTS | 300 | AEMF    |              |     |
| LACY        | P02920 | 417    | 12   | GLLSDKLGLRKY | 64 | IEKV   |              |     |              |     |         | GNYESIGFQGA  | 365 |

|             |        |     |    |               |    |      |              |     |              |     |      |              |     |
|-------------|--------|-----|----|---------------|----|------|--------------|-----|--------------|-----|------|--------------|-----|
| M DFA       | P0AEY8 | 410 | 12 | GPLSDRIGRRPV  | 72 | QESF |              |     |              |     |      |              |     |
| M DTD       | P36554 | 471 | 14 | GWLADKVGVRNI  | 66 | REQY | GLLVEYASWHWI | 166 |              |     |      |              |     |
| M DTG       | P25744 | 408 | 12 | GGLADRKGRKLM  | 75 |      | GLLADSYGLRPV | 163 | GKLGDRIGPEKI | 279 |      |              |     |
| M DTH       | P69367 | 402 | 12 | GAIADRFGAKPM  | 67 | RDTL |              |     |              |     |      |              |     |
| M DTL       | P31462 | 391 | 12 | GKVADRSGRKPV  | 59 | RDTL |              |     |              |     |      |              |     |
| M DTM       | P39386 | 410 | 12 | GPLSDRIGRRPV  | 69 | QEAF |              |     |              |     |      |              |     |
| <b>MELB</b> | P02921 | 473 | 12 |               |    |      |              |     |              |     |      |              |     |
| M HPT       | P77589 | 403 | 12 | GMLADRYGRKRI  | 71 | SEAA |              |     | GALMDKLRPVTM | 271 |      |              |     |
| N ANT       | P41036 | 496 | 14 | GAMGDRYGRRLA  | 76 | IESW | VVAAQVYSLVVP | 158 | GFLGDWLGTRKA | 332 |      | ALIAQRDLGTA  | 423 |
| N EPI       | P0ADL1 | 396 | 12 |               |    |      | SFLGELIGWRNV | 165 |              |     |      | GYALDNIGLTSP | 356 |
| N UPG       | P0AFF4 | 418 | 12 | GIVADKWL SAKW | 59 |      |              |     |              |     |      |              |     |
| P RP        | P0C0L7 | 500 | 12 | GMLGDKYGRQKI  | 87 | GEYT |              |     | GLLSDRFGRRPF | 312 |      |              |     |
| R HMT       | P76470 | 429 | 12 |               |    |      | GALLEMHGFMGH | 160 |              |     |      |              |     |
| S ETA       | P31675 | 392 | 12 | AKRSDSQDRRK   | 70 | REYA |              |     |              |     |      |              |     |
| S ETB       | P33026 | 393 | 12 | AGRSDKRGDRKS  | 72 | REHA |              |     |              |     |      | GIVAEIWNHAY  | 361 |
| S ETC       | P31436 | 394 | 12 | ARHSDKQGRKL   | 70 | REHA |              |     |              |     |      |              |     |
| S HIA       | P76350 | 438 | 12 | GHFGDRLGRKRM  | 85 | VESA |              |     | AWLADRFGRRRV | 307 | TEMF |              |     |
| S OTB       | P31122 | 396 | 12 |               |    |      |              |     |              |     |      | ALVGNQVSLHWS | 350 |
| T SGA       | P60778 | 393 | 12 |               |    |      |              |     |              |     |      | GPIVEHSGPQAA | 349 |
| U HPC       | P09836 | 439 | 12 | GIVSDRSNARYF  | 86 |      |              |     | GWGSDKLFNGNR | 307 | AECS |              |     |
| U HPT       | P0AGC0 | 463 | 12 | SYADGKNTKQF   | 86 |      |              |     | GWLSDLANGRRG | 316 | SEIF |              |     |
| U IDB       | P0CE44 | 457 | 12 | VRVFDAFADVFA  | 53 |      |              |     |              |     |      | GYIANQVQTPEV | 390 |
| X APB       | P45562 | 418 | 12 | GIIADKWLRAER  | 59 | LDPV |              |     |              |     |      | GMAVDYFSDGV  | 366 |
| X YLE       | P0AGF4 | 491 | 12 | GYCSNRFGRRDS  | 76 | AELA | ARSGDASWLNTD | 186 | IMTVDKFGRKPL | 333 | SEIF | FPMDKNSWLVA  | 426 |
| Y AAU       | P31679 | 443 | 12 | GYISDKVGRKRM  | 74 |      |              |     |              |     |      |              |     |

|             |        |     |    |               |    |      |              |     |              |     |      |               |     |
|-------------|--------|-----|----|---------------|----|------|--------------|-----|--------------|-----|------|---------------|-----|
| YAGG        | P75683 | 460 | 12 | GLLVDRTRTRHG  | 64 |      | GKGDEQVGYFGM | 171 |              |     |      |               |     |
| YAJR        | P77726 | 454 | 12 | GLLSDRIGRKLPL | 69 | SDLT | PIITHKLGLHAL | 156 | IIYAEVKRKMKQ | 268 | KESP |               |     |
| YBJJ        | P75810 | 402 | 12 |               |    |      |              |     | GWFIDRYSRVAV | 272 | SDTG | GYLGEHYGLRSA  | 359 |
| YCAD        | P21503 | 382 | 12 |               |    |      |              |     | GRLADKFGRLLV | 256 | CEKV |               |     |
| YDEE        | P31126 | 395 | 12 | GILADKFDKRY   | 64 | ADNL |              |     |              |     |      |               |     |
| YDFJ        | P77228 | 427 | 12 | GKMGDRIGRKKV  | 51 | AEYA |              |     | GWLSDKIGRRIP | 267 | LENI |               |     |
| YDHC        | P37597 | 403 | 12 | GPLSDRYGRKPV  | 62 | TDYY |              |     |              |     |      |               |     |
| YDHP        | P77389 | 389 | 12 |               |    |      | TWLGETIGWRMS | 150 | GKLADRSVNGTL | 258 |      |               |     |
| YDIM        | P76197 | 404 | 12 | GLLSDRFGRRPF  | 63 | LDAG |              |     |              |     |      | AHLSQRSIADIM  | 355 |
| YDIN        | P76198 | 421 | 12 | GVISDKFGRRAV  | 69 |      |              |     |              |     |      |               |     |
| YDJE        | P38055 | 452 | 12 | GFIGDYFGRRA   | 78 |      |              |     |              |     |      |               |     |
| YDJK        | P76230 | 459 | 12 | GIIGDKTGRRNA  | 79 | TEYM |              |     | MLVMDKIPRKT  | 320 | PEIW |               |     |
| <b>YEAN</b> | P76242 | 393 | 12 |               |    |      |              |     |              |     |      |               |     |
| YEBQ        | P76269 | 457 | 14 | SFLGDMFGYRRI  | 72 |      |              |     | GYLIERVHAGLL | 315 |      | ALMLNQFGDNGT  | 417 |
| YEGT        | P76417 | 425 | 12 | GSITDRFFSAQK  | 58 |      | GFLPQILGYADI | 146 |              |     |      | GVMMEKMFAYQE  | 358 |
| YFCJ        | P77549 | 392 | 12 | GRLADQYGAKRS  | 72 |      |              |     | GWMPDRFGGVKV | 267 | VEVV |               |     |
| YGAY        | P76628 | 394 | 12 | VPLGDMFERRRL  | 67 |      | GLLANLGGWRTV | 155 | GGFADKKGSHHT | 268 | LDLT |               |     |
| YHHS        | P37621 | 405 | 12 | GRYADSLGPKKI  | 74 |      |              |     |              |     |      |               |     |
| YHJE        | P37643 | 440 | 12 | GHFGRVGRKAT   | 85 | TENA |              |     | GLLADAFGRKRS | 305 | PELF |               |     |
| YHJX        | P37662 | 402 | 12 | GKLQERFGVKRV  | 67 |      |              |     | GILSDKIARIRV | 271 | SEFF |               |     |
| YICJ        | P31435 | 460 | 12 | GLLADRTRSRWG  | 66 | NDPT |              |     |              |     |      |               |     |
| YIHN        | P32135 | 421 | 12 | IYFADKLPRRYT  | 64 |      |              |     | GMISDKILKSPS | 276 |      | GYILDNLNPGIIG | 372 |
| YIHO        | P32136 | 467 | 12 | GFLLSRKNIGP   | 71 |      |              |     |              |     |      |               |     |
| YIHP        | P32137 | 461 | 12 | GIMLDSRRKIGP  | 74 |      |              |     |              |     |      |               |     |
| YJDL        | P39276 | 485 | 14 | GWLADRLLGNRT  | 65 | GELY | GLAAQWYGWHVG | 158 | LASPESRGNSTL | 328 |      |               |     |

|             |        |     |    |              |    |      |  |  |              |     |      |              |     |
|-------------|--------|-----|----|--------------|----|------|--|--|--------------|-----|------|--------------|-----|
| YJHB        | P39352 | 405 | 12 | GAMADKYGRKPM | 71 | GEYA |  |  | GFVGDKIGVKKA | 269 | YDYF |              |     |
| <b>YJIJ</b> | P39381 | 453 | 12 |              |    |      |  |  |              |     |      |              |     |
| YJJL        | P39398 | 453 | 12 | GPLLDKRGPRLM | 98 |      |  |  | GYVTDWLVKGGM | 314 |      | GFIVDTTHSFRL | 412 |
| YNFM        | P43531 | 417 | 12 | GPLSDAIGRKPV | 92 | SEEI |  |  |              |     |      |              |     |
| YQCE        | P77031 | 425 | 12 | GVIADKFSHRKM | 66 |      |  |  |              |     |      |              |     |

Table methods: Open reading frames of *E. coli* (K12) were down-loaded from the Swiss-Prot database. HMM models of MFS family were down-loaded from the Pfam database (19) and were used with the program HMMER-3.0 (20) to identify MFS proteins from *E. coli* (K12) genome. TM helices were additionally predicted using the program MEMSAT (21). A-like motifs were identified at proper loop regions using pattern search supplemented with visual inspection. For motifs A<sup>L2-3</sup> and A<sup>L8-9</sup>, short side chain residues for helix packing (*i.e.* positions +1 and +4), the central acidic residue for the charge-helix dipole interaction (*i.e.* +5), short side chain residues at position +8, and basic residue(s) for the charge-relay system (*e.g.* position +9) were included in the pattern search. For motifs A<sup>L5-6</sup> and A<sup>L11-12</sup>, only the first three factors were considered. Main results: Seventy-seven unique sequences were identified to belong to the MFS group. Of them, 67 were predicted to fold into 12-TM MFS proteins; and the rest ten were predicted to be 14-TM MFS proteins. Of the 77 sequences, only four do not show any detectable A-like motif. Sixty-two sequences contain potential motif A<sup>L2-3</sup>; 21 sequences contain potential motif A<sup>L5-6</sup>; 33 sequences contain potential motif A<sup>L8-9</sup>; and 20 sequences contain potential motif A<sup>L11-12</sup>. Of the 62 motifs A<sup>L2-3</sup>, 36 are accompanied by an acidic residue from the C-terminus of the predicted TM4; and of the 33 motifs A<sup>L8-9</sup>, 21 are accompanied by an acidic residue from the C-terminus of the predicted TM10. In general, motifs A<sup>L2-3</sup> and A<sup>L8-9</sup> are more clearly defined.

**Table S5.** Charge-helix dipole interactions in the YajR crystal structure.

| Helix dipole   | Position | Charged residue | Comments                                  |
|----------------|----------|-----------------|-------------------------------------------|
| TM1-N          | 11       | Glu10           | strictly conserved in YajRs               |
| TM2-N          | 48       | Glu47           | conserved in YajRs                        |
| TM3-C          | 97       | His165          |                                           |
| TM4a-C         | 111      | Arg24           | strictly conserved in YajRs               |
| TM4b-C         | 125      | Arg133          | conserved in YajRs                        |
| TM5-N          | 134      | Glu272          | inter-domain, conserved in YajRs          |
| TM6-C          | 185      | Lys78           | strictly conserved in YajRs               |
| $\alpha$ 6-7-N | 204      | Glu197          | conserved in YajRs                        |
| TM7-N          | 213      | Glu211          |                                           |
| TM8-C          | 274      | Arg275          |                                           |
| TM9-N          | 277      | Glu390          | from the TM-YAM domain linker             |
| TM10-C         | 330      | Lys336          | highly conserved ( <i>i.e.</i> Lys-Arg)   |
| TM11-N         | 337      | Asp73           | inter-domain, strictly conserved in YajRs |
| TM12-N         | 367      | Asp366          |                                           |
| TM12-C         | 386      | Lys278          | highly conserved                          |
